# Supplementary material for: Bowel preparation for elective colorectal resection: multi-treatment machine learning analysis on 6241 cases from a prospective Italian cohort
Source: Springer Nature journal article supplement (doi:10.1007/s00384-024-04627-6), 2024-04-16
Supplement: MOESM1 [file 384_2024_4627_MOESM1_ESM%20%281%29.pdf]

## **Bowel preparation for elective colorectal resection: multi-treatment machine-learning analysis on 6,241 cases from a prospective Italian cohort.**

Marco Catarci<sup>1α</sup>, MD, FACS, Stefano Guadagni<sup>2, 3</sup>, MD, Francesco Masedu<sup>3</sup>, PhD, Giacomo Ruffo<sup>4</sup>, MD, Massimo Giuseppe Viola<sup>5</sup>, MD, Felice Borghi<sup>6</sup>, MD, Gianluca Garulli<sup>7</sup>, MD, Felice Pirozzi<sup>8</sup>, MD, Paolo Delrio<sup>9</sup>, MD, Raffaele De Luca<sup>10</sup>, MD, Gianandrea Baldazzi<sup>11</sup>, MD, Marco Scatizzi<sup>12</sup>, MD, The Italian ColoRectal Anastomotic Leakage (iCral) study group\*.

From the <sup>1</sup>General Surgery Unit, Sandro Pertini Hospital, ASL Roma 2, Roma; <sup>2</sup>General Surgery Unit, Università degli Studi dell'Aquila, L'Aquila; <sup>3</sup>Department of Biotechnological and Applied Clinical Sciences, Università degli Studi dell'Aquila, L'Aquila; <sup>4</sup>General Surgery Unit, IRCCS Sacro Cuore Don Calabria Hospital, Negrar di Valpolicella (VR); <sup>5</sup>General Surgery Unit, Cardinale G. Panico Hospital, Tricase (LE); <sup>6</sup>Oncologic Surgery Unit, Candiolo Cancer Institute, FPO-IRCCS, Candiolo (TO); <sup>7</sup>General Surgery Unit, Infermi Hospital, Rimini; <sup>8</sup>General Surgery Unit, ASL Napoli 2 Nord, Pozzuoli (NA); <sup>9</sup>Colorectal Surgical Oncology, Istituto Nazionale per lo Studio e la Cura dei Tumori, "Fondazione Giovanni Pascale IRCCS-Italia", Naples; <sup>10</sup>Department of Surgical Oncology, IRCCS Istituto Tumori "Giovanni Paolo II", Bari; <sup>11</sup>General Surgery Unit, ASST Ovest Milanese, Legnano (MI); <sup>12</sup>General Surgery Unit, Santa Maria Annunziata & Serristori Hospital, Florence; Italy.

### **Corresponding Author:**

Stefano Guadagni, MD

Dipartimento di Scienze Cliniche Applicate e Biotecnologiche

Università degli Studi dell'Aquila, L'Aquila, Italy

Via Vetoio, snc; 67100 L'Aquila, Italy

Phone: +39 3339436171;

E-mail: [stefano.guadagni@univaq.it](mailto:stefano.guadagni@univaq.it); ORCID: 0000-0001-8525-084X

### **Supplementary Online Materials - Index**

|                  |               |
|------------------|---------------|
| Table S1         | <i>pag. 2</i> |
| Table S2         | <i>pag. 3</i> |
| Table S3         | <i>pag. 4</i> |
| Table S4         | <i>pag. 5</i> |
| STROBE Checklist | <i>pag. 6</i> |

**Table S1:** Binary comparison between NBP and oA groups.

| Outcomes                     | Pattern | NBP   |      | oA  |      | Generalized Boosted Regression model OR (95%CI) |
|------------------------------|---------|-------|------|-----|------|-------------------------------------------------|
|                              |         | No.   | %    | No. | %    |                                                 |
| s-d-SSI                      | Yes     | 125   | 3.3  | 10  | 2.5  | 0.67 (0.33-1.40) p=.285                         |
|                              | No      | 3,617 | 96.7 | 396 | 97.5 | Reference                                       |
| Deep wound dehiscence        | Yes     | 8     | 0.2  | 3   | 0.7  | 3.08 (0.84-11.2) p=.089                         |
|                              | No      | 3,734 | 99.8 | 403 | 99.3 | Reference                                       |
| Abdominal collection/abscess | Yes     | 63    | 1.7  | 3   | 0.7  | 0.35 (0.08-1.51) p=.157                         |
|                              | No      | 3,679 | 98.3 | 403 | 99.3 | Reference                                       |
| SSIs                         | Yes     | 188   | 5.0  | 15  | 3.7  | 0.66 (0.36-1.21) p=.179                         |
|                              | No      | 3,554 | 95.0 | 391 | 96.3 | Reference                                       |
| Reoperation                  | Yes     | 172   | 4.6  | 22  | 5.4  | 1.48 (0.86-2.53) p=.158                         |
|                              | No      | 3,570 | 95.4 | 384 | 94.6 | Reference                                       |
| Anastomotic leakage          | Yes     | 125   | 3.3  | 16  | 3.9  | 1.61 (0.88-2.94) p=.122                         |
|                              | No      | 3,617 | 96.7 | 390 | 96.1 | Reference                                       |
| Overall morbidity            | Yes     | 997   | 26.6 | 104 | 25.6 | 0.93 (0.70-1.23) p=.607                         |
|                              | No      | 2,745 | 73.4 | 302 | 74.4 | Reference                                       |
| Major morbidity              | Yes     | 198   | 5.3  | 31  | 7.6  | 2.07 (1.31-3.28) p=.002                         |
|                              | No      | 3,544 | 94.7 | 375 | 92.4 | Reference                                       |
| Mortality                    | Yes     | 32    | 0.9  | 2   | 0.5  | 0.86 (0.21-3.48) p=.833                         |
|                              | No      | 3,710 | 99.1 | 40  | 99.5 | Reference                                       |

NBP: no bowel preparation; oA: oral antibiotics alone; OR: odds ratio; 95%CI: 95% confidence interval; sdiSSIs: superficial and/or deep incisional surgical site infections; SSIs: Surgical Site Infections (sdiSSIs plus deep wound dehiscence plus abdominal collection/abscess).

**Table S2:** Binary comparison between NBP and MBP groups.

| Outcomes                     | NBP     |       |      | MBP   |      | Generalized Boosted Regression model OR (95%CI) |
|------------------------------|---------|-------|------|-------|------|-------------------------------------------------|
|                              | Pattern | No.   | %    | No.   | %    |                                                 |
| sdiSSIs                      | Yes     | 125   | 3.3  | 73    | 4.9  | 1.29 (0.81-2.07) p=.289                         |
|                              | No      | 3,617 | 96.7 | 1,413 | 95.1 | Reference                                       |
| Deep wound dehiscence        | Yes     | 8     | 0.2  | 5     | 0.3  | 0.75 (0.19-2.96) p=.678                         |
|                              | No      | 3,734 | 99.8 | 1,481 | 99.7 | Reference                                       |
| Abdominal collection/abscess | Yes     | 63    | 1.7  | 26    | 1.8  | 1.53 (0.81-2.91) p=.190                         |
|                              | No      | 3,679 | 98.3 | 1,460 | 98.2 | Reference                                       |
| SSIs                         | Yes     | 188   | 5.0  | 101   | 6.8  | 1.37 (0.93-2.03) p=.116                         |
|                              | No      | 3,554 | 95.0 | 1,385 | 93.2 | Reference                                       |
| Reoperation                  | Yes     | 172   | 4.6  | 92    | 6.2  | 1.26 (0.86-1.85) p=.230                         |
|                              | No      | 3,570 | 95.4 | 1,394 | 93.8 | Reference                                       |
| Anastomotic leakage          | Yes     | 125   | 3.3  | 83    | 5.6  | 1.82 (1.23-2.71) p=.003                         |
|                              | No      | 3,617 | 96.7 | 1,403 | 94.4 | Reference                                       |
| Overall morbidity            | Yes     | 997   | 26.6 | 430   | 28.9 | 1.38 (1.10-1.72) p=.005                         |
|                              | No      | 2,745 | 73.4 | 1,056 | 71.1 | Reference                                       |
| Major morbidity              | Yes     | 198   | 5.3  | 100   | 6.7  | 1.04 (0.72-1.52) p=.825                         |
|                              | No      | 3,544 | 94.7 | 1,386 | 93.3 | Reference                                       |
| Mortality                    | Yes     | 32    | 0.9  | 15    | 1.0  | 1.38 (0.61-3.11) p=.439                         |
|                              | No      | 3,710 | 99.1 | 1,471 | 99.0 | Reference                                       |

NBP: no bowel preparation; MBP: mechanical bowel preparation alone; OR: odds ratio; 95%CI: 95% confidence interval; sdiSSIs: superficial and/or deep incisional surgical site infections; SSIs: Surgical Site Infections (sdiSSIs plus deep wound dehiscence plus abdominal collection/abscess).

**Table S3:** Binary comparison between NBP and MoABP groups.

| Outcomes                     | NBP     |       |      | vs | MoABP |      | Generalized Boosted Regression model OR (95%CI) |
|------------------------------|---------|-------|------|----|-------|------|-------------------------------------------------|
|                              | Pattern | No.   | %    |    | No.   | %    |                                                 |
| sdiSSIs                      | Yes     | 125   | 3.3  |    | 10    | 1.7  | 0.29 (0.14-0.60) p=.001                         |
|                              | No      | 3,617 | 96.7 |    | 597   | 98.3 | Reference                                       |
| Deep wound dehiscence        | Yes     | 8     | 0.2  |    | 1     | 0.2  | 0.50 (0.06-4.13) p=.521                         |
|                              | No      | 3,734 | 99.8 |    | 606   | 99.8 | Reference                                       |
| Abdominal collection/abscess | Yes     | 63    | 1.7  |    | 6     | 1.0  | 0.54 (0.15-1.88) p=.332                         |
|                              | No      | 3,679 | 98.3 |    | 601   | 99.0 | Reference                                       |
| SSIs                         | Yes     | 188   | 5.0  |    | 17    | 2.8  | 0.42 (0.22-0.80) p=.008                         |
|                              | No      | 3,554 | 95.0 |    | 590   | 97.2 | Reference                                       |
| Reoperation                  | Yes     | 172   | 4.6  |    | 27    | 4.5  | 0.76 (0.47-1.22) p=.250                         |
|                              | No      | 3,570 | 95.4 |    | 580   | 95.5 | Reference                                       |
| Anastomotic leakage          | Yes     | 125   | 3.3  |    | 21    | 3.5  | 0.75 (0.44-1.30) p=.308                         |
|                              | No      | 3,617 | 96.7 |    | 586   | 96.5 | Reference                                       |
| Overall morbidity            | Yes     | 997   | 26.6 |    | 135   | 22.2 | 0.72 (0.53-0.98) p=.039                         |
|                              | No      | 2,745 | 73.4 |    | 472   | 77.8 | Reference                                       |
| Major morbidity              | Yes     | 198   | 5.3  |    | 30    | 4.9  | 0.71 (0.46-1.12) p=.140                         |
|                              | No      | 3,544 | 94.7 |    | 577   | 95.1 | Reference                                       |
| Mortality                    | Yes     | 32    | 0.9  |    | 2     | 0.3  | 0.62 (0.11-3.38) p=.578                         |
|                              | No      | 3,710 | 99.1 |    | 605   | 99.7 | Reference                                       |

NBP: no bowel preparation; MoABP: mechanical bowel preparation and oral antibiotics; OR: odds ratio; 95%CI: 95% confidence interval; sdiSSIs: superficial and/or deep incisional surgical site infections; SSIs: Surgical Site Infections (sdiSSIs plus deep wound dehiscence plus abdominal collection/abscess).

**Table S4:** Adverse events contributing to overall morbidity (OM, any adverse event) and major morbidity (MM, any adverse event grade > II) after elective colorectal surgery in 6,241 patients.

| Adverse event                        | NBP<br>(No.= 3,742) |        | oA<br>(No.= 406) |        | MBP<br>(No.= 1,486) |        | MoABP<br>(No.= 607) |        |
|--------------------------------------|---------------------|--------|------------------|--------|---------------------|--------|---------------------|--------|
|                                      | OM (%)              | MM (%) | OM (%)           | MM (%) | OM (%)              | MM (%) | OM (%)              | MM (%) |
| Anastomotic leakage                  | 3.3                 | 2.7    | 3.9              | 3.7    | 5.6                 | 4.7    | 3.5                 | 3.0    |
| sdiSSIs                              | 3.3                 | 0.2    | 2.5              | 0.7    | 4.9                 | 0.5    | 1.7                 | 0.0    |
| Deep wound dehiscence                | 0.2                 | 0.1    | 0.7              | 0.5    | 0.3                 | 0.0    | 0.2                 | 0.2    |
| Abdominal collection/abscess         | 1.7                 | 1.0    | 0.7              | 0.2    | 1.8                 | 1.0    | 1.0                 | 0.2    |
| Small bowel obstruction              | 1.3                 | 0.9    | 1.5              | 1.0    | 0.9                 | 0.6    | 2.3                 | 1.5    |
| Anastomotic bleeding                 | 2.0                 | 0.5    | 2.5              | 0.2    | 1.3                 | 0.4    | 1.6                 | 0.7    |
| Abdominal bleeding                   | 1.1                 | 0.7    | 0.2              | 0.2    | 1.1                 | 0.7    | 1.2                 | 0.3    |
| Small bowel perforation              | 0.3                 | 0.3    | 0.0              | 0.0    | 0.1                 | 0.1    | 0.3                 | 0.3    |
| Trocar/wound site bleeding           | 0.4                 | 0.1    | 0.2              | 0.0    | 0.3                 | 0.0    | 0.5                 | 0.0    |
| Anemia                               | 5.1                 | 0.1    | 3.4              | 0.2    | 4.8                 | 0.1    | 3.8                 | 0.0    |
| Paralytic ileus                      | 4.4                 | 0.1    | 3.7              | 0.0    | 4.0                 | 0.0    | 2.8                 | 0.0    |
| Fever                                | 3.4                 | 0.1    | 3.2              | 0.0    | 4.3                 | 0.1    | 2.5                 | 0.0    |
| DVT/pulmonary embolism               | 0.3                 | 0.1    | 0.2              | 0.0    | 0.3                 | 0.1    | 0.3                 | 0.2    |
| Neurologic                           | 0.6                 | 0.0    | 0.2              | 0.0    | 0.4                 | 0.0    | 0.3                 | 0.2    |
| Pneumonia and pulmonary failure      | 1.5                 | 0.4    | 3.9              | 0.5    | 2.0                 | 0.7    | 1.5                 | 0.2    |
| Urinary retention                    | 1.3                 | 0.0    | 0.5              | 0.0    | 1.3                 | 0.0    | 0.7                 | 0.0    |
| Urinary tract infection              | 0.2                 | 0.0    | 0.5              | 0.2    | 0.5                 | 0.0    | 0.3                 | 0.0    |
| Acute renal failure                  | 0.7                 | 0.1    | 1.0              | 0.0    | 0.7                 | 0.1    | 0.7                 | 0.2    |
| Acute mesenteric ischemia            | 0.0                 | 0.0    | 0.0              | 0.0    | 0.2                 | 0.2    | 0.0                 | 0.0    |
| Acute peptic ulcer/erosive gastritis | 0.1                 | 0.1    | 0.0              | 0.0    | 0.1                 | 0.1    | 0.0                 | 0.0    |
| Cardiac dysfunction and failure      | 1.4                 | 0.3    | 1.0              | 0.5    | 1.5                 | 0.3    | 0.8                 | 0.3    |
| Other                                | 5.3                 | 0.8    | 4.2              | 0.5    | 4.4                 | 0.8    | 4.6                 | 0.3    |

*NBP: no bowel preparation; oA: oral antibiotics; MBP: mechanical bowel preparation; MoABP: mechanical bowel preparation and oral antibiotics; OM: overall morbidity; MM: major morbidity; sdiSSIs: Superficial and/or deep incisional surgical site infections; DVT: deep venous thrombosis..*

STROBE Statement—Checklist of items that should be included in reports of *cohort studies*

|                              | Item No | Recommendation                                                                                                                                                                                                                                                                                                         | Page No |
|------------------------------|---------|------------------------------------------------------------------------------------------------------------------------------------------------------------------------------------------------------------------------------------------------------------------------------------------------------------------------|---------|
| <b>Title and abstract</b>    | 1       | (a) Indicate the study's design with a commonly used term in the title or the abstract<br>(b) Provide in the abstract an informative and balanced summary of what was done and what was found                                                                                                                          | 1       |
| <b>Introduction</b>          |         |                                                                                                                                                                                                                                                                                                                        |         |
| Background/rationale         | 2       | Explain the scientific background and rationale for the investigation being reported                                                                                                                                                                                                                                   | 3       |
| Objectives                   | 3       | State specific objectives, including any prespecified hypotheses                                                                                                                                                                                                                                                       | 4       |
| <b>Methods</b>               |         |                                                                                                                                                                                                                                                                                                                        |         |
| Study design                 | 4       | Present key elements of study design early in the paper                                                                                                                                                                                                                                                                | 4       |
| Setting                      | 5       | Describe the setting, locations, and relevant dates, including periods of recruitment, exposure, follow-up, and data collection                                                                                                                                                                                        | 4       |
| Participants                 | 6       | (a) Give the eligibility criteria, and the sources and methods of selection of participants. Describe methods of follow-up<br>(b) For matched studies, give matching criteria and number of exposed and unexposed                                                                                                      | 4-5     |
| Variables                    | 7       | Clearly define all outcomes, exposures, predictors, potential confounders, and effect modifiers. Give diagnostic criteria, if applicable                                                                                                                                                                               | 5       |
| Data sources/<br>measurement | 8*      | For each variable of interest, give sources of data and details of methods of assessment (measurement). Describe comparability of assessment methods if there is more than one group                                                                                                                                   | 4-5     |
| Bias                         | 9       | Describe any efforts to address potential sources of bias                                                                                                                                                                                                                                                              | 5       |
| Study size                   | 10      | Explain how the study size was arrived at                                                                                                                                                                                                                                                                              | 5       |
| Quantitative variables       | 11      | Explain how quantitative variables were handled in the analyses. If applicable, describe which groupings were chosen and why                                                                                                                                                                                           | 5       |
| Statistical methods          | 12      | (a) Describe all statistical methods, including those used to control for confounding<br>(b) Describe any methods used to examine subgroups and interactions<br>(c) Explain how missing data were addressed<br>(d) If applicable, explain how loss to follow-up was addressed<br>(e) Describe any sensitivity analyses | 6-7     |
| <b>Results</b>               |         |                                                                                                                                                                                                                                                                                                                        |         |
| Participants                 | 13*     | (a) Report numbers of individuals at each stage of study—eg numbers potentially eligible, examined for eligibility, confirmed eligible, included in the study, completing follow-up, and analysed<br>(b) Give reasons for non-participation at each stage<br>(c) Consider use of a flow diagram                        | 7       |
| Descriptive data             | 14*     | (a) Give characteristics of study participants (eg demographic, clinical, social) and information on exposures and potential confounders<br>(b) Indicate number of participants with missing data for each variable of interest<br>(c) Summarise follow-up time (eg, average and total amount)                         | 7       |
| Outcome data                 | 15*     | Report numbers of outcome events or summary measures over time                                                                                                                                                                                                                                                         | 7       |

|                          |    |                                                                                                                                                                                                                                                                                                                                                                                                               |      |
|--------------------------|----|---------------------------------------------------------------------------------------------------------------------------------------------------------------------------------------------------------------------------------------------------------------------------------------------------------------------------------------------------------------------------------------------------------------|------|
| Main results             | 16 | (a) Give unadjusted estimates and, if applicable, confounder-adjusted estimates and their precision (eg, 95% confidence interval). Make clear which confounders were adjusted for and why they were included<br>(b) Report category boundaries when continuous variables were categorized<br>(c) If relevant, consider translating estimates of relative risk into absolute risk for a meaningful time period | 7-8  |
| Other analyses           | 17 | Report other analyses done—eg analyses of subgroups and interactions, and sensitivity analyses                                                                                                                                                                                                                                                                                                                | n.a. |
| <b>Discussion</b>        |    |                                                                                                                                                                                                                                                                                                                                                                                                               |      |
| Key results              | 18 | Summarise key results with reference to study objectives                                                                                                                                                                                                                                                                                                                                                      | 8    |
| Limitations              | 19 | Discuss limitations of the study, taking into account sources of potential bias or imprecision. Discuss both direction and magnitude of any potential bias                                                                                                                                                                                                                                                    | 8-9  |
| Interpretation           | 20 | Give a cautious overall interpretation of results considering objectives, limitations, multiplicity of analyses, results from similar studies, and other relevant evidence                                                                                                                                                                                                                                    | 8-9  |
| Generalisability         | 21 | Discuss the generalisability (external validity) of the study results                                                                                                                                                                                                                                                                                                                                         | 8-9  |
| <b>Other information</b> |    |                                                                                                                                                                                                                                                                                                                                                                                                               |      |
| Funding                  | 22 | Give the source of funding and the role of the funders for the present study and, if applicable, for the original study on which the present article is based                                                                                                                                                                                                                                                 | 2    |
